CORRECTION

## Correction: Comparing households' perception of flood hazard with historical climate and hydrological data in the Lower Mono River catchment (West Africa), Benin and Togo

Nadège I. P. Dossoumou, Masamaéya D. T. Gnazou, Grace B. Villamor, Euloge K. Agbossou, Sophie Thiam, Simon Wagner, Mouhamed Idrissou

The seventh author's name is spelled incorrectly. The correct name is: Mouhamed Idrissou.

### Reference

1. Dossoumou NIP, Gnazou MDT, Villamor GB, Agbossou EK, Thiam S, Wagner S, et al. Comparing households' perception of flood hazard with historical climate and hydrological data in the Lower Mono River catchment (West Africa), Benin and Togo. PLOS Clim. 2023;2(4):e0000123. <https://doi.org/10.1371/journal.pclm.0000123>

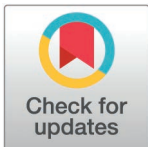

### OPEN ACCESS

**Citation:** Dossoumou NIP, Gnazou MDT, Villamor GB, Agbossou EK, Thiam S, Wagner S, et al. (2025) Correction: Comparing households' perception of flood hazard with historical climate and hydrological data in the Lower Mono River catchment (West Africa), Benin and Togo. PLOS Clim 4(10): e0000729. <https://doi.org/10.1371/journal.pclm.0000729>

**Published:** October 14, 2025

**Copyright:** © 2025 Dossoumou et al. This is an open access article distributed under the terms of the [Creative Commons Attribution License](https://creativecommons.org/licenses/by/4.0/), which permits unrestricted use, distribution, and reproduction in any medium, provided the original author and source are credited.
